# Supplementary material
Source: PubMed Central journal article supplement (PMC10006836)
Supplement: mmc1.pdf [file mmc1.pdf]

iScience, Volume 26

## **Supplemental information**

### **Centrifugal microfluidic-based multiplex recombinase polymerase amplification assay for rapid detection of SARS-CoV-2**

**Ruoxu Li, Ning Su, Xiaodong Ren, Xiange Sun, Wenman Li, Yuwei Li, Jin Li, Chen  
Chen, Hong Wang, Weiping Lu, Shaoli Deng, and Qing Huang**

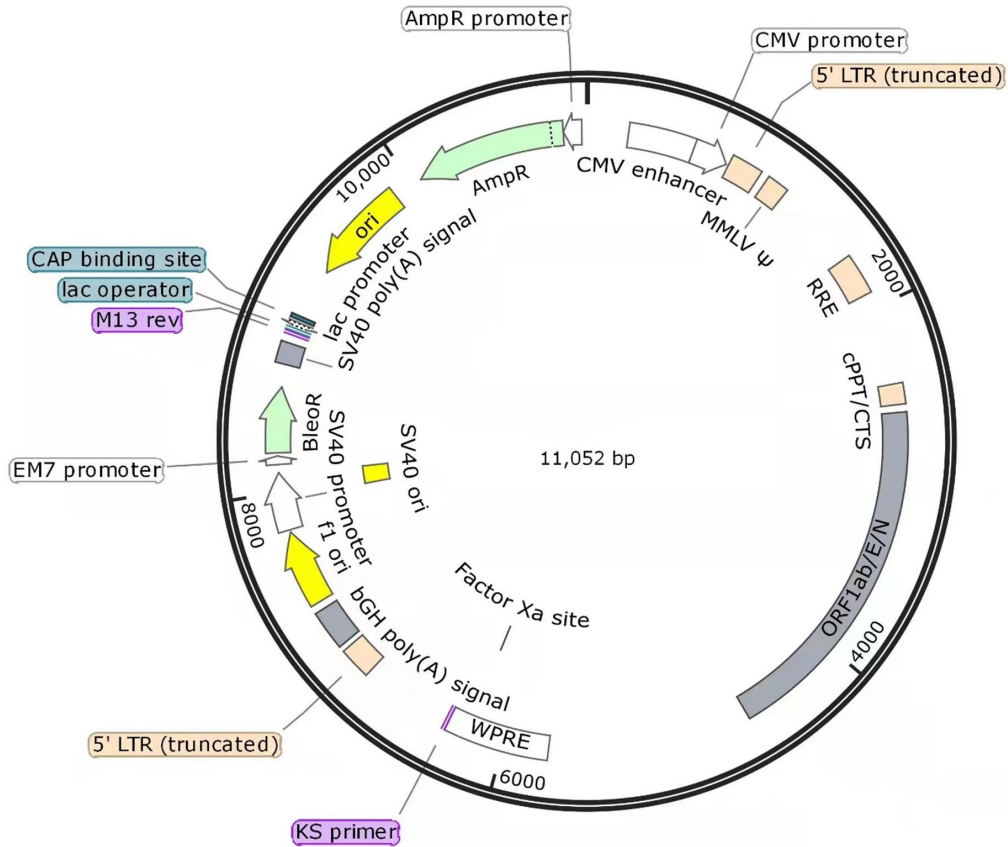

**Figure S1. Schematic map of the transfer plasmid of retroviral vector containing the target genes of SARS-CoV-2, related to STAR methods. The complete N gene, complete E gene, and partial ORF1ab gene of SARS-CoV-2 contained on the retroviral vector.**

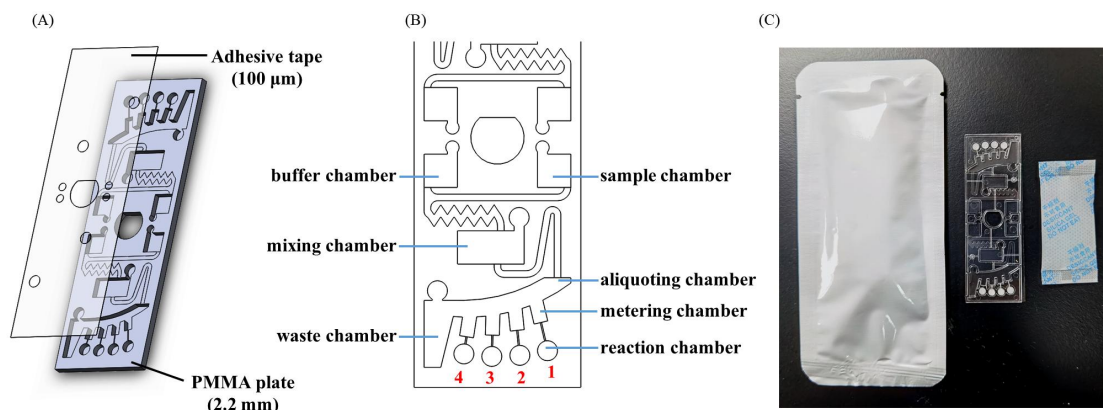

**Figure S2. Illustrations of the microscope slide-shaped microfluidic chip, related to Figure 4.**

(A) Schematic of the 3D structures of the microfluidic chip consisted of a PMMA plate and a pressure-sensitive adhesive layer.

(B) An enlarged schematic of each unit contained a buffer chamber, a sample chamber, a mixing chamber, an aliquoting chamber, a metering chamber, and four reaction chambers.

(C) Pictures of chip packaging.

### E gene

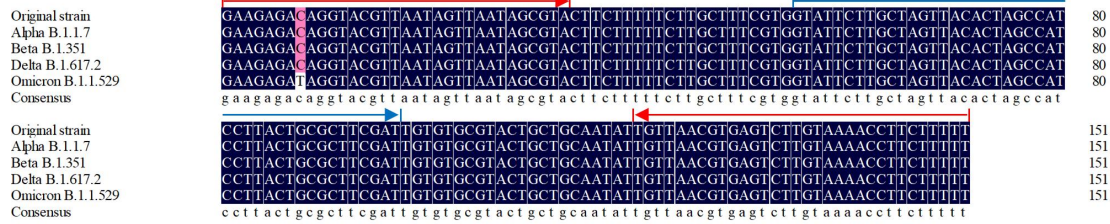

### N gene

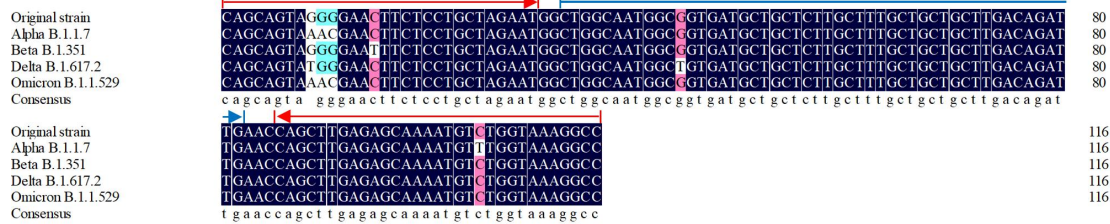

### ORF1ab gene

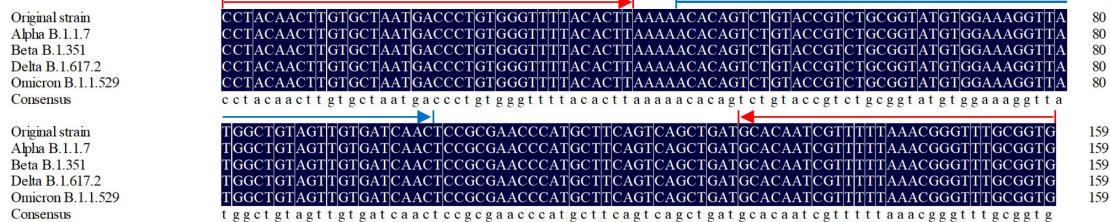

**Figure S3. Multiple sequence alignments of the original strain of SARS-CoV-2 with the other four common VOCs, related to Figure 3. Matched bases were highlighted in black; partially matched bases were highlighted in red or blue color, and mismatched bases were shown with a white background. A consensus sequence among all five sequences was shown. The red and blue arrows above the aligned sequences indicated the primers and probes used in this study, respectively.**

**Table S1.** Sequences of the SARS-CoV-2 pseudovirus with N, E, and ORF1ab genes, related to STAR methods.

| Gene       | Sequence (5'–3')                                                                                                                                                                                                                                                                                                                                                                                                                                                                                                                                                                                                                                                                                                                                                                                                                                                                                                                                                                                                                                                                                                                                                                                                                                                                                                                                                                                                                                      |
|------------|-------------------------------------------------------------------------------------------------------------------------------------------------------------------------------------------------------------------------------------------------------------------------------------------------------------------------------------------------------------------------------------------------------------------------------------------------------------------------------------------------------------------------------------------------------------------------------------------------------------------------------------------------------------------------------------------------------------------------------------------------------------------------------------------------------------------------------------------------------------------------------------------------------------------------------------------------------------------------------------------------------------------------------------------------------------------------------------------------------------------------------------------------------------------------------------------------------------------------------------------------------------------------------------------------------------------------------------------------------------------------------------------------------------------------------------------------------|
| N          | <p>ATGTCTGATAATGGACCCCAAATCAGCGAAATGCACCCCGCATTACGTTTGGTG<br/> GACCCTCAGATTCAACTGGCAGTAACCAGAATGGAGAACGCAGTGGGGCGCGAT<br/> CAAAACAACGTCGGCCCCAAGGTTTACCCAATAATACTGCGTCTTGGTTCACCCG<br/> TCTCACTCAACATGGCAAGGAAGACCTTAAATTCCTCGAGGACAAGGCGTTCC<br/> AATTAACACCAATAGCAGTCCAGATGACCAAATTGGCTACTACCGAAGAGCTACC<br/> AGACGAATTCGTGGTGGTGACGGTAAATGAAAGATCTCAGTCCAAGATGGTATT<br/> TCTACTACCTAGGAACTGGGCCAGAAGCTGGACTTCCCTATGGTGCTAACAAAGA<br/> CGGCATCATATGGGTTGCAACTGAGGGAGCCTTGAATACACCAAAAAGATCACATT<br/> GGCACCCGCAATCCTGCTAACAAATGCTGCAATCGTGCTACAACCTCCTCAAGGAA<br/> CAACATTGCCAAAAGGCTTCTACGCAGAAGGGAGCAGAGGCGGCAGTCAAGCC<br/> TCTTCTCGTTCCCTCATCACGTAGTCGCAACAGTTCAAGAAATCAACTCCAGGCA<br/> GCAGTAGGGGAACTTCTCCTGCTAGAATGGCTGGCAATGGCGGTGATGCTGCTCT<br/> TGCTTTGCTGCTGCTTGACAGATTGAACCAGCTTGAGAGCAAAATGTCTGGTAAA<br/> GGCCAACAACAAGGCCAAACTGTACTAAGAAATCTGCTGCTGAGGCTTCT<br/> AAGAAGCCTCGGCAAAAACGTAAGTCCACTAAAGCATAACAATGTAACACAAGCT<br/> TTCGGCAGACGTGGTCCAGAACAAACCCAAGGAAATTTGGGGACCAGGAACT<br/> AATCAGACAAGGAACTGATTACAAACATTGGCCGCAAATTCACAAATTTGCCCC<br/> AGCGCTTCAGCGTTCTTCGGAATGTGCGGCATTGGCATGGAAGTCACACCTTCGG<br/> GAACGTGGTTGACCTACACAGGTGCCATCAAATTGGATGACAAAGATCCAAATTT<br/> CAAAGATCAAGTCATTTGCTGAATAAGCATATTGACGCATAAAAACATTCCCA<br/> CCAACAGAGCCTAAAAAGGACAAAAAGAAGAAGGCTGATGAAACTCAAGCCTT<br/> ACCGCAGAGACAGAAGAAACAGCAAACCTGTGACTCTTCTCCTGCTGCAGATTT<br/> GGATGATTTCTCCAAACAATTGCAACAATCCATGAGCAGTGCTGACTCAACTCAG<br/> GCCTAA</p> |
| E          | <p>ATGTAICTAATTCGTTTCGGAAGAGACAGGTACGTTAATAGTTAATAGCGTACTTCT<br/> TTTTCTTGCTTTCGTGGTATTCTTGCTAGTTACTACTAGCCATCCTTACTGCGCTTCG<br/> ATTGTGTGCGTACTGCTGCAATATTGTTAACGTGAGTCTTGTAACCTTCTTTTT<br/> ACGTTTACTCTCGTGTTAAAAATCTGAATTCTTCTAGAGTTCCTGATCTTCTGGTC<br/> TAA</p>                                                                                                                                                                                                                                                                                                                                                                                                                                                                                                                                                                                                                                                                                                                                                                                                                                                                                                                                                                                                                                                                                                                                                                                   |
| ORF1a<br>b | <p>ATCGTGTTGTCTGTACTGCCGTTGCCACATAGATCATCAAATCCTAAAGGATTTT<br/> GTGACTTAAAAGGTAAGTATGTACAAATACCTACAACCTTGTGCTAATGACCCGTG<br/> GGGTTTTACACTTAAAAACACAGTCTGTACCGTCTGCGGTATGTGGAAAGGTTAT<br/> GGCTGTAGTTGTGATCAACTCCGCGAACCCATGCTTCAGTCAGCTGATGCACAAT<br/> CGTTTTTAAACGGGTTTGGCGGTGTAAGTGCAGCCCGTCTTACACCGTGCGGCACA<br/> GGCACTAGTACTGATGTCGTATACAGGGCTTTTGACATCTACAATGATAAAGTAGC<br/> TGGTTTTGCTAAATTCCTAAAAACTAATTGTTGTCGCTTCCAAGAAAAGGACGAA<br/> GATGACAATTTAATTGATTCTTACTTTGTAGTTAAGAGACACACTTTCTCTAACTA<br/> CCAACATGAAGAAACAATTTATAATTTACTTAAGGATTGTCCAGCTGTTGCTAAAC<br/> AT</p>                                                                                                                                                                                                                                                                                                                                                                                                                                                                                                                                                                                                                                                                                                                                                                                                                                                                   |

**Table S2.** RPA primers and probes used in this study, related to STAR methods.

| Gene   | Oligonucleotide | Sequence (5'–3') <sup>a</sup>                                                                     |
|--------|-----------------|---------------------------------------------------------------------------------------------------|
| N      | forward primer  | CAGCAGTAGGGGAACCTTCTCCTGCTAGAAT                                                                   |
|        | reverse primer  | GGCCTTTACCAGACATTTTGCTCTCAAGCTG                                                                   |
|        | probe           | CTGGCAATGGCGGTGATGCTGCTCTTGCTT[HEX-dT]G[THF][BHQ1-dT]GCTGCTTGACAGATT<br>GTGTGCAACTTTAG[phosphate] |
| ORF1ab | forward primer  | CCTACAACCTTGTGCTAATGACCCTGTGGGTTTTACACTT                                                          |
|        | reverse primer  | CACCGCAAACCCGTTTAAAAACGATTGTGC                                                                    |
|        | probe           | ACACAGTCTGTACCGTCTGCGGTATGTGGAAAGG[HEX-dT][THF]A[BHQ1-dT]GGCTGTAGTTG<br>TGATCAAC[phosphate]       |
| E      | forward primer  | GAAGAGACAGGTACGTTAATAGTTAATAGCGTA                                                                 |
|        | reverse primer  | AAAAAGAAGGTTTTACAAGACTCACGTTAACA                                                                  |
|        | probe           | ATCGAAGCGCAGTAAGGATGGCTAG[HEX-dT][THF][BHQ1-dT]AACTAGCAAGAATAC[phosphat<br>e]                     |
| ACTB   | forward primer  | CTCCATCCTGGCCTCGCTGTCCACCTTCCAG                                                                   |
|        | reverse primer  | AATCTCATCTTGTTTTCTGCGCAAGTTAGG                                                                    |
|        | probe           | GTCAAGAAAGGGTGTAACGCAACTAAGTCA[HEX-dT][THF]G[BHQ1-dT]CCGCCTAGAAGCAT<br>[phosphate]                |

<sup>a</sup> HEX-dT, thymidine nucleotide carrying fluorescein ROX; THF, tetrahydrofuran spacer; BHQ1-dT, thymidine nucleotide carrying Black Hole Quencher 1; phosphate, 3' phosphate to block elongation.

**Table S3.** The analytical specificity of three SARS-CoV-2 RT-RPA assay, related to Figure 3 and 6.

| Nucleic acid                        | N | E | ORF1ab |
|-------------------------------------|---|---|--------|
| SARS-CoV-2                          | + | + | +      |
| SARS-CoV                            | — | — | +      |
| human coronavirus 229E              | — | — | —      |
| human coronavirus NL63              | — | — | —      |
| human coronavirus OC43              | — | — | —      |
| human coronavirus HKU1              | — | — | —      |
| MERS-Coronavirus                    | — | — | —      |
| influenza A virus                   | — | — | —      |
| influenza B virus                   | — | — | —      |
| respiratory syncytial virus A and B | — | — | —      |
| human parainfluenza virus           | — | — | —      |
| adenovirus                          | — | — | —      |
| enterovirus                         | — | — | —      |
| epstein-barr virus                  | — | — | —      |
| human cytomegalovirus               | — | — | —      |
| human genome                        | — | — | —      |

**Table S4.** The burst frequency of each capillary valve on the microscope slide microfluidic chip, related to Figure 4.

| Capillary valve                     | Calculated burst frequency (RPM) | working spin speed (RPM) |
|-------------------------------------|----------------------------------|--------------------------|
| the inlet to the mixing chamber     | 1054.95                          | 3000                     |
| the inlet to the aliquoting chamber | 981.69                           | 1500                     |
| the inlet to the reaction chamber   | 1720.38                          | 7000                     |
